# Supplementary material for: Prevalence of HIV Preexposure Prophylaxis Prescribing Among Persons With Commercial Insurance and Likely Injection Drug Use
Source: PubMed Central journal article supplement (PMC9277489; doi:10.1001/jamanetworkopen.2022.21346), 2022-07-12
Supplement: jamanetwopen-e2221346-s001.pdf [file jamanetwopen-e2221346-s001.pdf]

## Supplemental Online Content

Streed CG Jr, Morgan JR, Gai MJ, Laroche MR, Paasche-Orlow MK, Taylor JL. Prevalence of HIV preexposure prophylaxis prescribing among persons with commercial insurance and likely injection drug use. *JAMA Netw Open*. 2022;5(7):e2221346.  
doi:10.1001/jamanetworkopen.2022.21346

### **eTable.** Diagnostic Codes Utilized

This supplemental material has been provided by the authors to give readers additional information about their work.

**eTable 1.** Diagnostic Codes Utilized

| Text Label                             | Version | Diagnosis Code |
|----------------------------------------|---------|----------------|
| <b>Substance Use Diagnoses</b>         |         |                |
| Opioid use disorder                    | ICD-9   | 304.0x         |
|                                        |         | 304.7x         |
|                                        | ICD-10  | F11x           |
| Cocaine use disorder                   | ICD-9   | 304.2x         |
|                                        |         | 305.6x         |
|                                        | ICD-10  | F14.2x         |
|                                        |         | F14.1x         |
|                                        | F14.9x  |                |
| Other stimulant dependence             | ICD-9   | 304.4x         |
|                                        |         | 305.7x         |
|                                        | ICD-10  | F15.2x         |
|                                        |         | F15.1x         |
|                                        | F15.9x  |                |
| <b>Sexual Behavior</b>                 |         |                |
| High-risk sexual behavior              | ICD-9   | V69.2          |
| High-risk heterosexual behavior        | ICD-10  | Z72.51         |
| High-risk homosexual behavior          | ICD-10  | Z72.52         |
| High-risk bisexual behavior            | ICD-10  | Z72.53         |
| <b>Sexually transmitted infections</b> |         |                |
| Chlamydia                              | ICD-9   | 078.88         |
|                                        |         | 079.88         |
|                                        |         | 079.98         |
|                                        |         | 099.41         |
|                                        |         | 099.5          |
|                                        | ICD-10  | A74.x          |
|                                        | A56.xx  |                |
| Gonorrhea                              | ICD-9   | 098.xx         |
|                                        | ICD-10  | A54.xx         |
| Syphilis                               | ICD-9   | 090.xx         |
|                                        |         | 091.xx         |
|                                        |         | 092.xx         |
|                                        |         | 093.xx         |
|                                        |         | 094.xx         |
|                                        |         | 095.xx         |
|                                        |         | 096.xx         |
| 097.xx                                 |         |                |

|                |        |        |
|----------------|--------|--------|
|                | ICD-10 | A50.xx |
|                |        | A51.0  |
|                |        | A51.49 |
|                |        | A52.3  |
|                |        | A53.0  |
|                |        | A53.9  |
| Herpes simplex | ICD-9  | 054.1  |
|                |        | 054.10 |
|                |        | 054.19 |
|                | ICD-10 | A60.xx |
|                |        | A53    |
|                |        | A55    |
|                |        | A57    |
|                |        | A58    |
